# Supplementary material for: A Simple Nonviral Method to Generate Human Induced Pluripotent Stem Cells Using SMAR DNA Vectors
Source: MDPI journal article supplement (doi:10.3390/genes15050575), 2024-04-30
Supplement: s1 [file s1]

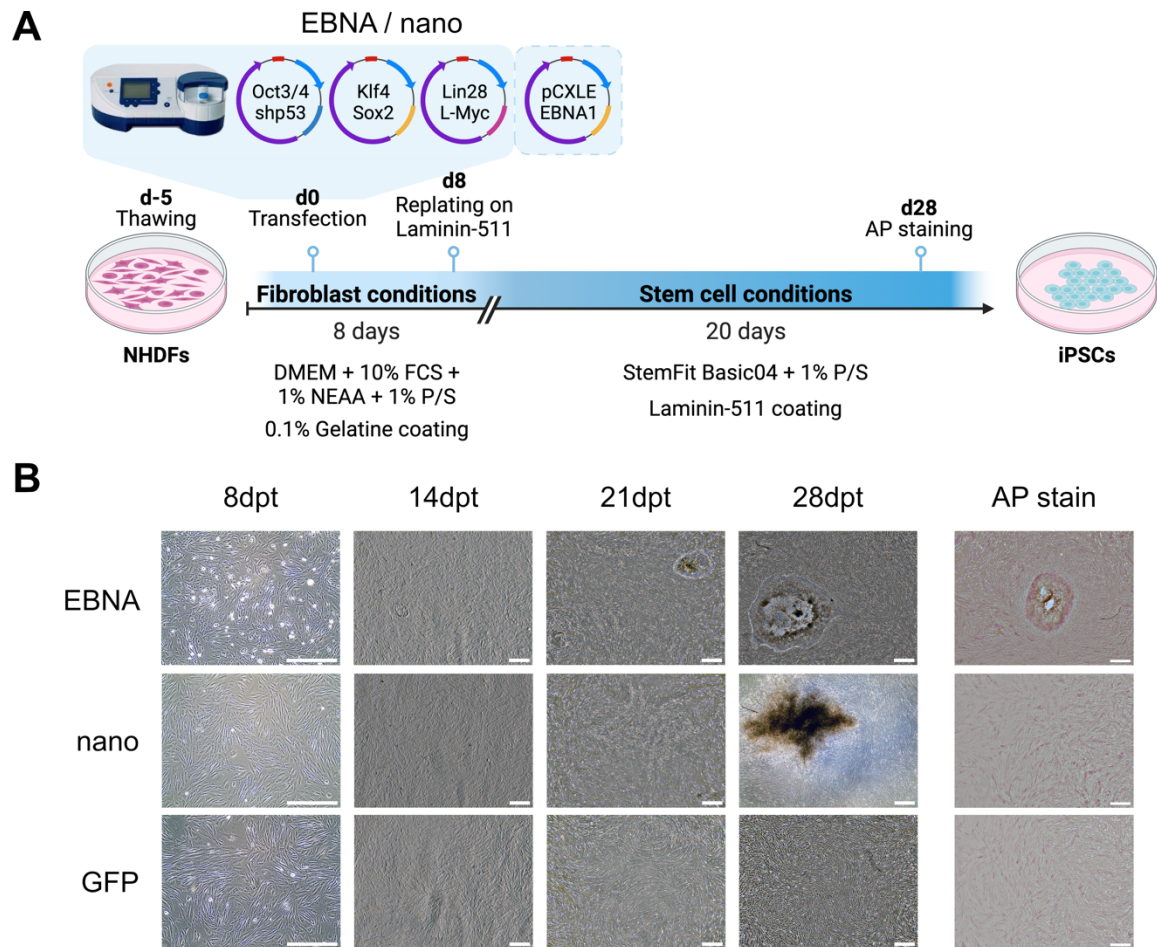

Figure S1 Nanovectors are not capable of fully reprogramming NHDFs without episomal maintenance. **A** NHDFs were transfected with EBNA or nano reprogramming vectors and cultured for 28 days. Cells were then fixed and stained for alkaline phosphatase (AP). **B** Brightfield images of NHDFs after transfection over time. Cells were fixed and stained for alkaline phosphatase (AP) at day 28 (right). Scale = 500 $\mu$ m.

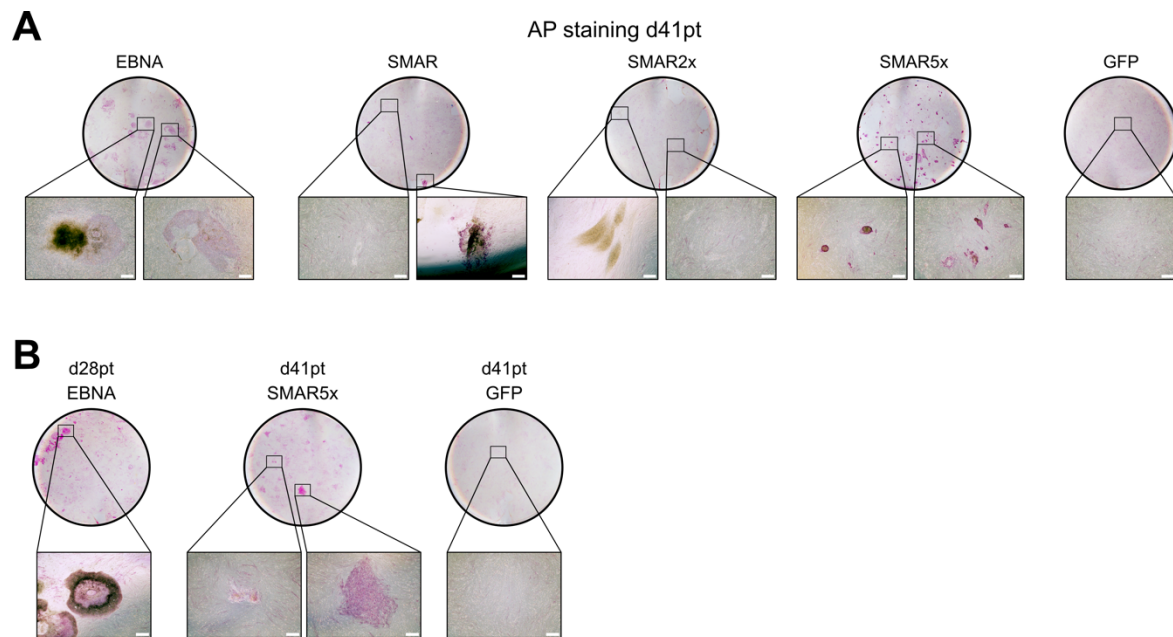

Figure S2 Colonies formed from EBNA and SMAR5x transfection express alkaline phosphatase. NHDFs were transfected with EBNA or SMAR reprogramming vectors and cultured for up to 41 days. Cells were then fixed and stained for alkaline phosphatase (AP). **A** Representative images of AP-stained wells 41 days post transfection, after colony picking, for all transfection conditions. **B** Cells were reprogrammed as above, and AP staining of EBNA-transfected cells at day 28 post transfection was compared with SMAR5x transfection at day 41 post transfection.

Table S 1 List of cloning primers used in this study

| #  | Name       | Sequence (5' -> 3')                                  | Template vector | Final product |
|----|------------|------------------------------------------------------|-----------------|---------------|
| 1  | Oct_fwd    | CGCTAGCGCTACCGGTGAATTCGCCCTTCACCATG<br>GC            | pCXLE_hO_       | SMAR_hO       |
| 2  | Oct_rev    | TATCATCGAGCTCGAGTCATATGACTAGTCCCCGA<br>AGCTTGAATTCG  | shP53           |               |
| 3  | KS_fwd     | CGCTAGCGCTACCGGTGAATTCGCCCTTCACCATGT<br>ACAAC        | pCXLE_hSK       | SMAR_hSK      |
| 4  | KS_rev     | TATCATCGAGCTCGAGTTAAAAATGTCTCTTCATGT<br>GTAAGGCGAGGT |                 |               |
| 5  | UL_fwd     | CGCTAGCGCTACCGGTGAATTCGCCCTTCACCATG<br>GAC           | pCXLE_hUL       | SMAR_hUL      |
| 6  | UL_rev     | TATCATCGAGCTCGAGTCAATTCTGTGCCTCCGGG<br>AGCA          |                 |               |
| 7  | shP53_fwd  | AATGTATCTTACATGGATCCGACGCCGCCA                       | pCXLE_hO_       | SMAR_hO_      |
| 8  | shP53_rev  | CCTTTTGCTCACATGCCCCGGGCTGCAGGA                       | shP53           | SMAR_GFP_     |
| 9  | GFP2AP_fwd | TTTTGGCAAAGAATTCATGCCCGCCATGAAGATCG                  | pSMARt          | EBNA_GFP-     |
| 10 | GFP2AP_rev | CCCGAAGCTTGAATTCTCAGGCACCGGGCTTGC                    |                 | p2A-Puro      |

Table S 2 List of qRT-PCR primers used in this study

| Name               | Sequence (5' -> 3')          | Target gene | Product size (bp) | Purpose                                       |
|--------------------|------------------------------|-------------|-------------------|-----------------------------------------------|
| SOX17_F            | GCTTTCATGGTGTGGGCTAA         | SOX17       | 105               | trilineage differentiation of iPSCs, endoderm |
| SOX17_R            | CGCCTTCCACGACTTGC            |             |                   |                                               |
| FOXA2_F            | TACAGGCGCAGCTACACGCACGCAAAG  | FOXA2       | 216               | trilineage differentiation of iPSCs, endoderm |
| FOXA2_R            | GCGGGGCACCTTCAGGAAACAGTCGT   |             |                   |                                               |
| KDR_F              | CTGGCATGGTCTTCTGTGAAGCA      | KDR         | 790               | trilineage differentiation of iPSCs, mesoderm |
| KDR_R              | AATACCAGTGGATGTGATGGCGG      |             |                   |                                               |
| Brachyury_F        | GGATGAAGGCTCCCGTCTC          | TBXT        | 208               | trilineage differentiation of iPSCs, mesoderm |
| Brachyury_R        | GCTGTGATCTCCTCGTTCTGATA      |             |                   |                                               |
| Sox1_F             | GGTCAAACGGCCCATGAACGC        | SOX1        | 249               | trilineage differentiation of iPSCs, ectoderm |
| Sox1_R             | TCCTTCTTGAGCAGCGTCTTGGTCTT   |             |                   |                                               |
| hu_PAX6-F          | TTTGCCCGAGAAAGACTAGC         | PAX6        | 83                | trilineage differentiation of iPSCs, ectoderm |
| hu_PAX6-R          | CATTTGGCCCTTCGATTAGA         |             |                   |                                               |
| human endo_KLF4-F  | TGATTGTAGTGCTTTCTGGCTGGGCTCC | KLF4        | 397               | iPSC phenotyping                              |
| human endo_KLF4-R  | ACGATCGTGGCCCCGAAAAGGACC     |             |                   |                                               |
| human endo_c-MYC-F | GCGTCCTGGGAAGGGAGTCCGGAGC    | MYC         | 325               | iPSC phenotyping                              |
| human endo_c-MYC-R | TTGAGGGGCATCGTCGCGGGAGGCTG   |             |                   |                                               |
| hOCT3/4-S1165      | GACAGGGGGAGGGGAGGAGCTAGG     | POU5F1      | 144               | iPSC phenotyping                              |
| hOCT3/4-AS1283     | CTTCCCTCCAACCAGTTGCCCCAAAC   |             |                   |                                               |
| hSOX2-S1430        | GGGAAATGGGAGGGGTGCAAAGAGG    | SOX2        | 151               | iPSC phenotyping                              |
| hSOX2-AS1555       | TTGCGTGAGTGTGGATGGGATTGGTG   |             |                   |                                               |
| hNANOG-S           | CAGCCCTGATTCTTCCACCAGTCCC    | NANOG       | 309               | iPSC phenotyping                              |
| hNANOG-AS          | CGGAAGATTCCCAGTCGGGTTCACC    |             |                   |                                               |
| hGDF3-S243         | CTTATGCTACGTAAAGGAGCTGGG     | GDF3        | 631               | iPSC phenotyping                              |
| hGDF3-AS850        | GTGCCAACCCAGGTCCCGGAAGTT     |             |                   |                                               |
| hREX1-RT-S         | CAGATCCTAAACAGCTCGCAGAAT     | ZFP42       | 305               | iPSC phenotyping                              |
| hREX1-RT-AS        | GCGTACGCAAATTAAAGTCCAGA      |             |                   |                                               |
| hFGF4-RT-S         | CTACAACGCCTACGAGTCTTACA      | FGF4        | 371               | iPSC phenotyping                              |
| hFGF4-RT-AS        | GTTGCACCAGAAAAGTCAGAGTTG     |             |                   |                                               |
| hESG1-S40          | ATATCCCGCCGTGGGTGAAAGTTC     | DPPA5       | 234               | iPSC phenotyping                              |
| hESG1-AS259        | ACTCAGCCATGGACTGGAGCATCC     |             |                   |                                               |
| hTERT-S3234        | CCTGCTCAAGCTGACTCGACACCGTG   | TERT        | 446               | iPSC phenotyping                              |
| hTERT-AS3713       | GGAAAAGCTGGCCCTGGGGTGGAGC    |             |                   |                                               |
| GAPDH Forward      | GCCAAAAGGGTCATCATCTC         | GAPDH       | 117               | iPSC phenotyping                              |
| GAPDH Reverse      | GGTGGTGCAGGAGGCATT           |             |                   |                                               |

Table S 3 Cycling conditions for qRT-PCRs to assay iPSC pluripotency and differentiation

| <b>Cycle step</b>    | <b>Temperature</b>                     | <b>Time</b> | <b>Cycles</b> |
|----------------------|----------------------------------------|-------------|---------------|
| Initial denaturation | 95°C                                   | 3 min       | 1             |
| Denaturation         | 95°C                                   | 30 sec      | 40            |
| Annealing            | 58°C (stem) or 58.3°C (differentiated) | 30 sec      |               |
| Extension            | 72°C                                   | 30 sec      |               |
| Final denaturation   | 95°C                                   | 1 min       | 1             |
| Annealing            | 65°C                                   | 1 min       | 1             |
| Melting curve        | 65°C – 95°C                            | 0.5°C/sec   | 1             |

Table S 4 List of primary antibodies and their dilutions used in this study. All antibodies used target human proteins.

| Application    | Antibody                                   | Clone    | Dilution | Company                                  | Catalogue No. |
|----------------|--------------------------------------------|----------|----------|------------------------------------------|---------------|
| WB             | Goat anti-Oct3/4                           | n-19     | 1:100    | Santa Cruz Biotech (Texas, USA)          | sc-8628       |
| WB             | Rabbit anti-Klf4                           | H-180    | 1:500    | Santa Cruz Biotech                       | sc-20691      |
| WB             | Rabbit anti-Sox2                           |          | 1:1000   | Merck Millipore (Darmstadt, DE)          | AB5603        |
| WB             | Mouse anti-Lin28                           | C-9      | 1:200    | Santa Cruz Biotech                       | sc-374460     |
| WB             | Mouse anti-L-Myc                           |          | 1:1000   | Abcam (Amsterdam, NL)                    | ab167315      |
| WB             | Mouse anti- $\alpha$ -tubulin              | DM1A     | 1:5000   | Thermo Fisher Scientific (Rockford, USA) | 62204         |
| IF, mesoderm   | Goat anti-NCAM(CD56) IgG                   |          | 1:100    | R&D Systems (Minneapolis, USA)           | AF2408        |
| IF, endoderm   | Goat anti-SOX17 IgG                        |          | 1:100    | R&D Systems                              | AF1924        |
| IF, ectoderm   | Mouse anti- $\beta$ -Tubulin-III IgG       | SDL3D10  | 1:1000   | Sigma-Aldrich (St Louis, USA)            | T8660         |
| IF, Stem       | Mouse anti- SSEA4                          | MC813-70 | 1:75     | Abcam                                    | AB16287       |
| IF, Stem       | Rabbit anti- NANOG                         |          | 1:100    | Abcam                                    | AB21624       |
| IF, Stem       | Mouse anti- TRA1-81 IgM                    | TRA-1-81 | 1:150    | Abcam                                    | AB16289       |
| IF, Stem       | Rabbit anti- OCT4                          |          | 1:300    | Abcam                                    | AB1985        |
| Flow cytometry | Mouse BV785 anti-CD45                      | HI30     | 1:50     | BioLegend (San Diego, USA)               | 304047        |
| Flow cytometry | Mouse PE anti- CD56                        | 5.1H11   | 1:50     | BioLegend                                | 362508        |
| Flow cytometry | Mouse APC anti- CD3                        | SK7      | 1:50     | BioLegend                                | 344812        |
| Flow cytometry | Mouse BV421 anti-CD57                      | QA17A04  | 1:100    | BioLegend                                | 393325        |
| Flow cytometry | Mouse BUV395 anti-CD314 (NKG2D)            | 1D11     | 1:50     | BD Biosciences (Erembodegem, BE)         | 743561        |
| Flow cytometry | Mouse BUV496 anti-CD16                     | 3G8      | 1:40     | BD Biosciences                           | 612944        |
| Flow cytometry | Mouse BV421 anti-CD94                      | HP-3D9   | 1:100    | BD Biosciences                           | 743948        |
| Flow cytometry | Mouse APC anti- CD69                       | FN50     | 1:50     | BioLegend                                | 310910        |
| Flow cytometry | Mouse PE/Cy7 anti-CD158 (KIR2DL1/S1/S3/S5) | HP-MA4   | 1:50     | BioLegend                                | 339511        |

Table S 5 List of secondary antibodies and their dilutions used in this study

| Application | Antibody                   | Conjugation     | Dilution | Company                                   | Catalogue No. |
|-------------|----------------------------|-----------------|----------|-------------------------------------------|---------------|
| WB          | Goat anti-Mouse            | HRP             | 1:5000   | Jackson Immuno-Research (West Grove, USA) | 115-035-044   |
| WB          | Donkey anti-Rabbit         | HRP             | 1:10,000 | Life Technologies (Bleiswijk, NL)         | A16023        |
| WB          | Donkey anti-Goat           | HRP             | 1:10,000 | Life Technologies                         | A15999        |
| IF          | Donkey anti-Goat IgG (H+L) | Alexa Fluor 488 | 1:500    | Invitrogen (Bleiswijk, NL)                | A11055        |
| IF          | Goat anti-Mouse IgG (H+L)  | Alexa Fluor 546 | 1:500    | Invitrogen                                | A11003        |
| IF          | Goat anti-Rabbit IgG (H+L) | Alexa Fluor 488 | 1:500    | Invitrogen                                | A11008        |

Table S 6 List of reprogramming vector series used in this study and their properties.

|                                              | <b>EBNA</b> | <b>SMAR</b> | <b>nano</b> |
|----------------------------------------------|-------------|-------------|-------------|
| Bacterial sequences and antibiotic selection | Yes         | Yes         | No          |
| Viral Components                             | Yes         | No          | No          |
| Oncogenic                                    | Potentially | No          | No          |
| Episomal maintenance                         | Yes         | Yes         | No          |
| Vector size                                  | Large       | Medium      | Small       |
| Safety profile                               | Low         | Medium      | Very high   |
| Reprogramming capacity                       | Yes         | Untested    | Untested    |
